# Supplementary material for: Alterations in the coupling functions between cerebral oxyhaemoglobin and arterial blood pressure signals in post-stroke subjects
Source: PubMed Central journal article supplement (PMC5905974; doi:10.1371/journal.pone.0195936), 2018-04-18
Supplement: pone.0195936.s001.pdf [file pone.0195936.s001.pdf]

**S1 Table**

| Frequency interval     | L–H group     |                 | p     | R–H group     |                 | p     |
|------------------------|---------------|-----------------|-------|---------------|-----------------|-------|
|                        | Affected-side | Unaffected-side |       | Affected-side | Unaffected-side |       |
| Frequency Interval I   |               |                 |       |               |                 |       |
| PFC                    | 0.29(0.25)    | 0.27(0.18)      | 0.714 | 0.30(0.18)    | 0.23(0.15)      | 0.174 |
| PL                     | 0.27(0.13)    | 0.29(0.14)      | 0.119 | 0.35(0.05)    | 0.36(0.07)      | 0.868 |
| OL                     | 0.32(0.14)    | 0.36(0.10)      | 0.164 | 0.36(0.03)    | 0.40(0.07)      | 0.079 |
| Frequency Interval II  |               |                 |       |               |                 |       |
| PFC                    | 0.19(0.05)    | 0.19(0.04)      | 0.579 | 0.19(0.06)    | 0.17(0.05)      | 0.425 |
| PL                     | 0.20(0.05)    | 0.20(0.05)      | 0.841 | 0.20(0.03)    | 0.19(0.02)      | 0.451 |
| OL                     | 0.19(0.03)    | 0.20(0.02)      | 0.080 | 0.19(0.03)    | 0.19(0.03)      | 0.441 |
| Frequency Interval III |               |                 |       |               |                 |       |
| PFC                    | 0.06(0.01)    | 0.07(0.01)      | 0.095 | 0.07(0.015)   | 0.09(0.02)      | 0.075 |
| PL                     | 0.08(0.007)   | 0.07(0.006)     | 0.016 | 0.08(0.008)   | 0.09(0.02)      | 0.629 |
| OL                     | 0.08(0.01)    | 0.08(0.009)     | 0.397 | 0.08(0.015)   | 0.08(0.01)      | 0.750 |
| Frequency Interval IV  |               |                 |       |               |                 |       |
| PFC                    | 0.53(0.61)    | 0.55(0.54)      | 0.786 | 0.62(1.02)    | 0.72(0.54)      | 0.740 |
| PL                     | 0.52(0.25)    | 0.59(0.29)      | 0.434 | 0.68(0.37)    | 0.79(0.53)      | 0.280 |
| OL                     | 0.34(0.32)    | 0.50(0.41)      | 0.186 | 0.62(0.74)    | 0.64(0.66)      | 0.887 |

Data are presented as mean (SD); *p* values are for the differences between affected side and unaffected side; the *p* values with black fonts indicated the difference was statistically significant.
